# Supplementary material for: The Web-Based Randomized Controlled Intervention as the Enhancer of Cancer Prevention
Source: PubMed Central journal article supplement (PMC6723358; doi:10.3390/medicina55080434), 2019-08-03
Supplement: medicina-55-00434-s001.pdf [file medicina-55-00434-s001.pdf]

**Table 1.** Percentage of initial consents for selected medical procedures in relation to particular independent variables and statistical significance of differences in  $\chi^2$  test.

| Independent variables                                                            |                | Medical procedures |    |       |    |      |    |      |    |       |    |       |    |      |    |       |    |       |    |         |    |
|----------------------------------------------------------------------------------|----------------|--------------------|----|-------|----|------|----|------|----|-------|----|-------|----|------|----|-------|----|-------|----|---------|----|
|                                                                                  |                | BFNA               |    | USG   |    | MMG  |    | DRE  |    | Col.  |    | Bron. |    | Pan. |    | Exc.  |    | CT    |    | Surgery |    |
|                                                                                  |                | %                  | p  | %     | p  | %    | p  | %    | p  | %     | p  | %     | p  | %    | p  | %     | p  | %     | p  | %       | p  |
| Age group (years)                                                                | <24            | 77.0               |    | 96.7  |    | 89.5 |    | 64.5 |    | 72.4  |    | 75.7  |    | 76.3 |    | 93.4  |    | 96.7  |    | 34.9    |    |
|                                                                                  | 24-41          | 81.9               | NS | 97.4  | NS | 87.7 | NS | 83.2 | a  | 89.7  | a  | 83.9  | c  | 86.5 | a  | 90.3  | NS | 99.4  | NS | 47.1    | a  |
|                                                                                  | >41            | 86.5               |    | 100.0 |    | 87.2 |    | 89.1 |    | 94.9  |    | 87.2  |    | 92.9 |    | 85.9  |    | 99.4  |    | 59.6    |    |
| Gender                                                                           | Male           | 79.3               | NS | 95.5  | b  | 88.8 | NS | 80.4 | NS | 84.4  | NS | 82.7  | NS | 86.6 | NS | 88.3  | NS | 97.2  | NS | 48.0    | NS |
|                                                                                  | Female         | 83.5               |    | 99.6  |    | 87.7 |    | 78.2 |    | 86.6  |    | 82.0  |    | 84.5 |    | 90.8  |    | 99.3  |    | 46.8    |    |
| Number of inhabitants in place of residence                                      | ≤100,000       | 78.0               | NS | 96.3  |    | 87.6 | NS | 75.7 | NS | 82.1  | NS | 78.4  | NS | 82.1 | NS | 88.5  | NS | 97.7  | NS | 44.5    | NS |
|                                                                                  | >100,000       | 85.3               |    | 99.6  | c  | 88.6 |    | 82.0 |    | 89.0  |    | 85.7  |    | 88.2 |    | 91.0  |    | 99.2  |    | 49.8    |    |
| Level of education                                                               | Primary        | 69.0               |    | 89.7  |    | 86.2 |    | 37.9 |    | 58.6  |    | 65.5  |    | 65.5 |    | 89.7  |    | 89.7  |    | 31.0    |    |
|                                                                                  | Secondary      | 76.0               |    | 98.2  |    | 89.2 |    | 74.3 |    | 81.4  |    | 77.2  |    | 80.8 |    | 88.0  |    | 98.2  |    | 40.7    |    |
|                                                                                  | Highschool     | 85.7               | b  | 98.7  | b  | 86.6 | NS | 85.3 | a  | 90.3  | a  | 87.0  | b  | 89.9 | a  | 89.9  | NS | 99.6  | a  | 52.9    | c  |
|                                                                                  | Higher medical | 96.6               |    | 100.0 |    | 96.6 |    | 96.6 |    | 100.0 |    | 89.7  |    | 93.1 |    | 100.0 |    | 100.0 |    | 55.2    |    |
| Occupation                                                                       | Other          | 80.2               | c  | 97.7  | NS | 86.6 | c  | 77.1 | c  | 84.3  | NS | 81.2  | NS | 84.0 | NS | 88.4  | c  | 98.2  | NS | 47.4    | NS |
|                                                                                  | Medical        | 90.7               |    | 100.0 |    | 96.0 |    | 89.3 |    | 93.3  |    | 88.0  |    | 92.0 |    | 97.3  |    | 100.0 |    | 46.7    |    |
| Positive family history of cancer                                                | No             | 70.0               | a  | 96.7  | NS | 70.0 | a  | 83.3 | NS | 87.5  | NS | 83.3  | NS | 86.7 | NS | 81.7  | b  | 98.3  | NS | 46.7    | NS |
|                                                                                  | Yes            | 86.0               |    | 98.5  |    | 94.5 |    | 77.6 |    | 85.1  |    | 81.9  |    | 84.8 |    | 92.7  |    | 98.5  |    | 47.5    |    |
| Participant with diagnosis of cancer                                             | No             | 81.4               | NS | 98.1  | NS | 88.1 | NS | 78.2 | NS | 84.3  | b  | 81.4  | NS | 84.5 | NS | 90.1  | NS | 98.5  | NS | 44.8    | b  |
|                                                                                  | Yes            | 86.0               |    | 98.0  |    | 88.0 |    | 86.0 |    | 98.0  |    | 90.0  |    | 92.0 |    | 88.0  |    | 98.0  |    | 68.0    |    |
| Participant treated oncologically                                                | No             | 81.7               | NS | 98.1  | NS | 88.4 | NS | 77.6 | c  | 84.6  | c  | 81.2  | NS | 84.3 | NS | 90.1  | NS | 98.3  | NS | 44.6    | a  |
|                                                                                  | Yes            | 83.3               |    | 97.9  |    | 85.4 |    | 91.7 |    | 95.8  |    | 91.7  |    | 93.8 |    | 87.5  |    | 100.0 |    | 70.8    |    |
| Self-declaration of sufficient cancer-related level of knowledge                 | No             | 80.4               | NS | 97.5  | NS | 87.8 | NS | 77.3 | NS | 83.4  | b  | 81.2  | NS | 84.3 | NS | 88.7  | NS | 98.1  | NS | 46.7    | NS |
|                                                                                  | Yes            | 87.1               |    | 100.0 |    | 89.1 |    | 85.1 |    | 94.1  |    | 86.1  |    | 89.1 |    | 94.1  |    | 100.0 |    | 49.5    |    |
| Self-declaration of willingness to improve the level of cancer-related knowledge | No             | 77.1               | NS | 97.1  | NS | 88.6 | NS | 77.1 | NS | 85.7  | NS | 88.6  | NS | 88.6 | NS | 88.6  | NS | 97.1  | NS | 51.4    | NS |
|                                                                                  | Yes            | 82.2               |    | 98.1  |    | 88.1 |    | 79.2 |    | 85.7  |    | 81.8  |    | 85.0 |    | 90.0  |    | 98.6  |    | 47.0    |    |

BFNA–Breast Fine Needle Aspiration; USG–abdominal ultrasonography; Col.–colonoscopy; Bron.– bronchoscopy; Pan.– panendoscopy; Exc. –excision of a naevus; CT–computed tomography; Surg.- Surgical procedure with possible artificial anus; p – statistical significance in  $\chi^2$  test: a <0.001; b <0.01; c <0.05; NS–not significant.

**Table 2.** Differences in percentages of consents for selected medical procedures in which was observed changes after educational intervention in relation to particular independent variables.

| Independent variables                                                            |          | Medical procedure |       |     |    |      |       |      |       |      |    |       |       |      |       |
|----------------------------------------------------------------------------------|----------|-------------------|-------|-----|----|------|-------|------|-------|------|----|-------|-------|------|-------|
|                                                                                  |          | BFNA              |       | USG |    | MMG  |       | DRE  |       | Col. |    | Bron. |       | Pan. |       |
|                                                                                  |          | D                 | p     | D   | p  | D    | p     | D    | p     | D    | p  | D     | p     | D    | p     |
| Age group (years)                                                                | <24      | 10.1              | NS    | 0.0 | NS | 10.2 | <0.05 | 7.3  | NS    | 4.4  | NS | 7.2   | NS    | 5.8  | NS    |
|                                                                                  | 24-41    | 6.3               | NS    | 0.0 | NA | 1.6  | NS    | 9.5  | <0.05 | 1.6  | NS | 1.5   | NS    | 1.6  | NS    |
|                                                                                  | >41      | 2.6               | NS    | 3.2 | NS | 6.7  | NS    | -2.7 | NS    | 2.6  | NS | 4.0   | NS    | 6.6  | NS    |
| Gender                                                                           | Male     | 10.2              | <0.05 | 1.3 | NS | 7.6  | <0.05 | 3.8  | NS    | 3.8  | NS | 6.4   | NS    | 6.3  | NS    |
|                                                                                  | Female   | 3.9               | NS    | 0.8 | NA | 5.5  | NS    | 4.6  | NS    | 2.3  | NS | 3.1   | NS    | 3.9  | NS    |
| Number of inhabitants in place of residence                                      | ≤100,000 | 11.7              | <0.05 | 3.2 | NA | 6.4  | NS    | 8.6  | <0.05 | 4.2  | NS | 6.4   | NS    | 6.4  | NS    |
|                                                                                  | >100,000 | 1.8               | NS    | 0.9 | NS | 6.2  | <0.05 | 0.9  | NS    | 1.8  | NS | 2.6   | NS    | 3.5  | NS    |
| Level of education                                                               | Lower    | 14.3              | <0.01 | 1.1 | NS | 6.6  | NS    | 5.5  | NS    | 0.0  | NS | 5.5   | NS    | 5.5  | NS    |
|                                                                                  | Higher   | 0.0               | NS    | 0.8 | NS | 6.0  | NS    | 3.4  | NS    | 5.2  | NS | 3.5   | NS    | 4.3  | NS    |
| Occupation                                                                       | Other    | 7.5               | <0.05 | 1.1 | NS | 5.8  | <0.05 | 4.6  | NS    | 4.1  | NS | 6.4   | <0.05 | 6.4  | <0.05 |
|                                                                                  | Medical  | 0.0               | NS    | 0.0 | NA | 8.8  | NA    | 3.0  | NS    | 3.0  | NS | 5.9   | NS    | 2.9  | NS    |
| Positive family history of cancer                                                | No       | 15.3              | <0.05 | 1.7 | NS | 16.9 | <0.01 | 0.0  | NS    | 3.4  | NS | 6.7   | NS    | 8.4  | NS    |
|                                                                                  | Yes      | 2.7               | NS    | 0.7 | NS | 2.0  | NS    | 6.1  | NS    | 2.7  | NS | 3.4   | NS    | 3.4  | NS    |
| Participant with diagnosis of cancer                                             | No       | 6.9               | <0.05 | 1.0 | NS | 6.4  | <0.01 | 3.8  | NS    | 3.2  | NS | 4.3   | NS    | 4.8  | NS    |
|                                                                                  | Yes      | 0.0               | NS    | 0.0 | NA | 5.2  | NS    | 10.5 | NS    | 0.0  | NA | 5.3   | NA    | 5.2  | NS    |
| Participant treated oncologically                                                | No       | 6.0               | NS    | 1.1 | NS | 4.8  | <0.05 | 3.7  | NS    | 3.2  | NS | 3.8   | NS    | 4.3  | NS    |
|                                                                                  | Yes      | 9.5               | NS    | 0.0 | NA | 19.0 | NA    | 9.5  | NS    | 0.0  | NS | 9.5   | NA    | 9.5  | NA    |
| Self-declaration of sufficient cancer-related level of knowledge                 | No       | 5.6               | NS    | 1.9 | NS | 5.5  | <0.05 | 4.3  | NS    | 5.0  | NS | 5.6   | NS    | 6.2  | <0.05 |
|                                                                                  | Yes      | 8.7               | NS    | 2.2 | NA | 8.7  | NS    | 4.3  | NS    | 4.4  | NS | 0.0   | NS    | 0.0  | NS    |
| Self-declaration of willingness to improve the level of cancer-related knowledge | No       | 13.4              | NS    | 0.0 | NA | 6.6  | NS    | 13.4 | NS    | 0.0  | NS | -     | NS    | -    | NS    |
|                                                                                  | Yes      | 5.7               | NS    | 1.1 | NS | 6.2  | <0.01 | 3.6  | NS    | 3.1  | NS | 5.2   | NS    | 5.7  | <0.05 |

D – relative difference between final and initial percentage of consents (in %); p – statistical significance in McNemar test; NS – not significant; NA - not available; BFNA - Breast Fine Needle Aspiration; USG – abdominal ultrasonography; Col–colonoscopy; Bron.–bronchoscopy; Pan. – panendoscopy.
